# Supplementary material for: Concomitant drugs associated with increased mortality for MDMA users reported in a drug safety surveillance database
Source: PubMed Central journal article supplement (PMC7966744; doi:10.1038/s41598-021-85389-x), 2021-03-16
Supplement: 41598_2021_85389_MOESM1_ESM.pdf [file 41598_2021_85389_MOESM1_ESM.pdf]

## **Concomitant drugs associated with increased mortality for MDMA users reported in a drug safety surveillance database**

Isaac V. Cohen<sup>1</sup>, Tigran Makunts<sup>2,3</sup>, Ruben Abagyan<sup>2\*</sup>, Kelan Thomas<sup>4</sup>

<sup>1</sup> Clinical Pharmacology and Therapeutics, University of California San Francisco, San Francisco, California

<sup>2</sup>Skaggs School of Pharmacy and Pharmaceutical Sciences, University of California San Diego, La Jolla, California

<sup>3</sup>Oak Ridge Institute of Science and Education, Center for Drug Evaluation and Research, United States Food and Drug Administration, Silver Spring, Maryland

<sup>4</sup>College of Pharmacy, Touro University California, Vallejo, CA

\*Correspondence to RA: [rabagyan@health.ucsd.edu](mailto:rabagyan@health.ucsd.edu)

### **Supplementary information**

**Figure S1. Frequency of most common side effects**

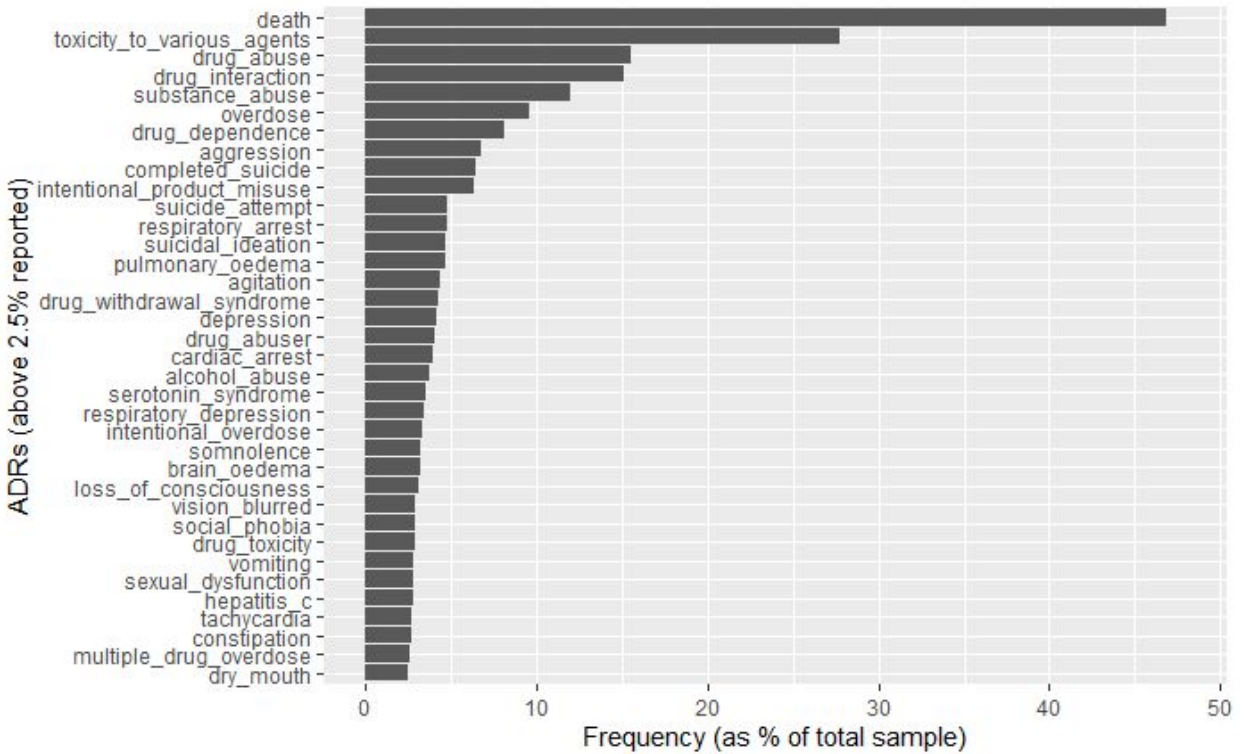

**Supp. Figure 1 Legend.** Frequency of occurrence of the most common side effects in the dataset (above 2.5%).

**Table S1. Univariate Unadjusted Odds Ratios for Odds of Death**

| <b>Class Name</b>                    | <b>OR</b> | <b>95%CI-Lo</b> | <b>95%CI-Hi</b> |
|--------------------------------------|-----------|-----------------|-----------------|
| <b>Opioids</b>                       | 1.20      | 1.08            | 1.34            |
| <b>Antidepressants</b>               | 0.93      | 0.80            | 1.08            |
| <b>Benzodiazepines</b>               | 1.80      | 1.54            | 2.14            |
| <b>Amphetamines &amp; Stimulants</b> | 2.23      | 1.82            | 2.76            |
| <b>Cannabinoids</b>                  | 0.59      | 0.45            | 0.77            |
| <b>Antipsychotics</b>                | 0.74      | 0.58            | 0.92            |
| <b>Cocaine</b>                       | 0.37      | 0.27            | 0.50            |
| <b>Non-Opioids for Pain</b>          | 0.68      | 0.51            | 0.90            |
| <b>Dissociative Anesthetics</b>      | 1.31      | 0.95            | 1.83            |
| <b>Psychedelics</b>                  | 0.31      | 0.18            | 0.51            |
| <b>Anesthetics</b>                   | 3.14      | 1.94            | 5.84            |
| <b>HIV</b>                           | 0.33      | 0.13            | 0.58            |
| <b>AEDs</b>                          | 0.81      | 0.54            | 1.15            |
| <b>Sedative Hypnotics</b>            | 0.93      | 0.63            | 1.37            |
| <b>Ethanol</b>                       | 1.46      | 0.87            | 2.47            |
| <b>Antimicrobials</b>                | 0.13      | 0.03            | 0.35            |
| <b>MDMA Metab. &amp; Analogs</b>     | 18.56     | 5.70            | 114.16          |
| <b>Muscle Relaxants</b>              | 2.62      | 1.24            | 6.21            |
| <b>*Lithium</b>                      | NA        | NA              | NA              |
| <b>Nicotine</b>                      | 0.06      | 0.01            | 0.21            |
| <b>Anticholinergic</b>               | 0.73      | 0.42            | 1.25            |

**Supp. Table 1 Legend.** Univariate unadjusted odds ratios for risk of death per additional drug added on from each class. 95% Confidence intervals reported. Odds Ratios (OR) greater than 1 indicate increased risk of death. Odds Ratios less than 1 indicate decreased risk of death. (\*Note that the OR for Lithium is incalculable due to no occurrences of death in the study).

**Table S2. Drugs Included in Study and their Drug Class Assignments**

| <b>Drug Class</b>                    | <b>Drug Name</b>                        |
|--------------------------------------|-----------------------------------------|
| <i>AED</i>                           | pregabalin                              |
| <i>AED</i>                           | lamotrigine                             |
| <i>AED</i>                           | valproic_acid                           |
| <i>AED</i>                           | gabapentin                              |
| <i>AED</i>                           | levetiracetam                           |
| <i>AED</i>                           | topiramate                              |
| <i>AED</i>                           | briviact                                |
| <i>AED</i>                           | depamide                                |
| <i>AED</i>                           | lacosamide                              |
| <i>AED</i>                           | phenytoin                               |
| <i>AED</i>                           | carbamazepine                           |
| <i>AED</i>                           | oxcarbazepine                           |
| <i>Amphetamines &amp; Stimulants</i> | methamphetamine                         |
| <i>Amphetamines &amp; Stimulants</i> | amphetamine                             |
| <i>Amphetamines &amp; Stimulants</i> | methylphenidate                         |
| <i>Amphetamines &amp; Stimulants</i> | amfetamine                              |
| <i>Amphetamines &amp; Stimulants</i> | methylenedioxyamphetamine               |
| <i>Amphetamines &amp; Stimulants</i> | amphetamines                            |
| <i>Amphetamines &amp; Stimulants</i> | metamfetamine                           |
| <i>Amphetamines &amp; Stimulants</i> | pseudoephedrine                         |
| <i>Amphetamines &amp; Stimulants</i> | adderall                                |
| <i>Amphetamines &amp; Stimulants</i> | amphetamine,dextroamphetamine           |
| <i>Amphetamines &amp; Stimulants</i> | dextroamphetamine_and_amphetamine_salts |
| <i>Amphetamines &amp; Stimulants</i> | modafinil                               |
| <i>Amphetamines &amp; Stimulants</i> | amfetamine_sulfate                      |
| <i>Amphetamines &amp; Stimulants</i> | atomoxetine                             |
| <i>Amphetamines &amp; Stimulants</i> | centrally_acting_sympathomimetics       |
| <i>Amphetamines &amp; Stimulants</i> | ibuprofen,pseudoephedrine               |
| <i>Amphetamines &amp; Stimulants</i> | actifed                                 |
| <i>Amphetamines &amp; Stimulants</i> | armodafinil                             |
| <i>Amphetamines &amp; Stimulants</i> | cathinone                               |
| <i>Amphetamines &amp; Stimulants</i> | cathinone_derivatives_no_pref_name      |
| <i>Amphetamines &amp; Stimulants</i> | ephedrine                               |
| <i>Amphetamines &amp; Stimulants</i> | mcat                                    |
| <i>Amphetamines &amp; Stimulants</i> | mephedrone                              |
| <i>Amphetamines &amp; Stimulants</i> | n_methylephedrone                       |
| <i>Amphetamines &amp; Stimulants</i> | paramethoxymethamphetamine_no_pref_name |

|                                      |                                    |
|--------------------------------------|------------------------------------|
| <i>Amphetamines &amp; Stimulants</i> | ritaline                           |
| <i>Amphetamines &amp; Stimulants</i> | speed                              |
| <i>Amphetamines &amp; Stimulants</i> | 3_fluorophenmetrazine              |
| <i>Amphetamines &amp; Stimulants</i> | 4_mec                              |
| <i>Amphetamines &amp; Stimulants</i> | 4_methyl_n_ethyl_pentdrone         |
| <i>Amphetamines &amp; Stimulants</i> | 4_methylmethcathinone              |
| <i>Amphetamines &amp; Stimulants</i> | amphetamine_no_pref_name           |
| <i>Amphetamines &amp; Stimulants</i> | amphetamine_salts_amfetamine_salts |
| <i>Amphetamines &amp; Stimulants</i> | amphetamine_salts_no_pref_name     |
| <i>Amphetamines &amp; Stimulants</i> | crystal_methamphetamine            |
| <i>Amphetamines &amp; Stimulants</i> | epinephrine                        |
| <i>Amphetamines &amp; Stimulants</i> | lisdexamfetamine                   |
| <i>Amphetamines &amp; Stimulants</i> | metamfetamine_hcl                  |
| <i>Amphetamines &amp; Stimulants</i> | metamphetamine                     |
| <i>Amphetamines &amp; Stimulants</i> | methamphetamine_no_pref_name       |
| <i>Amphetamines &amp; Stimulants</i> | methamphetamines                   |
| <i>Amphetamines &amp; Stimulants</i> | methylamphetamine                  |
| <i>Amphetamines &amp; Stimulants</i> | norepinephrine                     |
| <i>Amphetamines &amp; Stimulants</i> | phentermine                        |
| <i>Amphetamines &amp; Stimulants</i> | phenylephrine                      |
| <i>Amphetamines &amp; Stimulants</i> | stimulants                         |
| <i>Anesthetics</i>                   | epinephrine,lidocaine              |
| <i>Anesthetics</i>                   | rocuronium                         |
| <i>Anesthetics</i>                   | anesthetics                        |
| <i>Anesthetics</i>                   | benzocaine                         |
| <i>Anesthetics</i>                   | bupivacaine                        |
| <i>Anesthetics</i>                   | local_anesthetics                  |
| <i>Anesthetics</i>                   | procaine                           |
| <i>Anesthetics</i>                   | suxamethonium                      |
| <i>Anesthetics</i>                   | vecuronium                         |
| <i>Anticholinergic</i>               | diphenhydramine                    |
| <i>Anticholinergic</i>               | promethazine                       |
| <i>Anticholinergic</i>               | diphenhydramine,zinc               |
| <i>Anticholinergic</i>               | trihexyphenidyl                    |
| <i>Anticholinergic</i>               | atropine                           |
| <i>Anticholinergic</i>               | dimenhydrinate                     |
| <i>Anticholinergic</i>               | benzatropine                       |
| <i>Anticholinergic</i>               | acetaminophen,diphenhydramine      |
| <i>Anticholinergic</i>               | donormyl                           |

|                        |                                                                            |
|------------------------|----------------------------------------------------------------------------|
| <i>Anticholinergic</i> | donormyl doxylamine sodium bromide sodium phosphate dibasic sodium sulfate |
| <i>Anticholinergic</i> | scopolamine                                                                |
| <i>Anticholinergic</i> | tiotropium                                                                 |
| <i>Antidepressants</i> | fluoxetine                                                                 |
| <i>Antidepressants</i> | venlafaxine                                                                |
| <i>Antidepressants</i> | citalopram                                                                 |
| <i>Antidepressants</i> | paroxetine                                                                 |
| <i>Antidepressants</i> | bupropion                                                                  |
| <i>Antidepressants</i> | lofepramine                                                                |
| <i>Antidepressants</i> | sertraline                                                                 |
| <i>Antidepressants</i> | mirtazapine                                                                |
| <i>Antidepressants</i> | desvenlafaxine                                                             |
| <i>Antidepressants</i> | antidepressants                                                            |
| <i>Antidepressants</i> | trazodone                                                                  |
| <i>Antidepressants</i> | seroxat_smith_kline_beecham                                                |
| <i>Antidepressants</i> | escitalopram                                                               |
| <i>Antidepressants</i> | dothiepin_hcl                                                              |
| <i>Antidepressants</i> | moclobemide                                                                |
| <i>Antidepressants</i> | reboxetine                                                                 |
| <i>Antidepressants</i> | dothiepin_00160401                                                         |
| <i>Antidepressants</i> | doxepin                                                                    |
| <i>Antidepressants</i> | duloxetine                                                                 |
| <i>Antidepressants</i> | amitriptyline                                                              |
| <i>Antidepressants</i> | antidepressant_nos                                                         |
| <i>Antidepressants</i> | desipramine                                                                |
| <i>Antidepressants</i> | dothiepin                                                                  |
| <i>Antidepressants</i> | efexor                                                                     |
| <i>Antidepressants</i> | nortriptylin                                                               |
| <i>Antidepressants</i> | phenelzine                                                                 |
| <i>Antidepressants</i> | ratio_venlafaxine                                                          |
| <i>Antidepressants</i> | selective_serotonin_reuptake_inhibitor                                     |
| <i>Antidepressants</i> | sertralin_01011402                                                         |
| <i>Antidepressants</i> | st_john_s_wort                                                             |
| <i>Antidepressants</i> | tricyclic_antidepressants                                                  |
| <i>Antimicrobials</i>  | clarithromycin                                                             |
| <i>Antimicrobials</i>  | azithromycin                                                               |
| <i>Antimicrobials</i>  | clindamycin                                                                |
| <i>Antimicrobials</i>  | glecaprevir,pibrentasvir                                                   |
| <i>Antimicrobials</i>  | fluconazole                                                                |

|                       |                                              |
|-----------------------|----------------------------------------------|
| <i>Antimicrobials</i> | levamisole                                   |
| <i>Antimicrobials</i> | sulfamethoxazole,trimethoprim                |
| <i>Antimicrobials</i> | amoxicillin                                  |
| <i>Antimicrobials</i> | cephalexin                                   |
| <i>Antimicrobials</i> | doxycycline                                  |
| <i>Antimicrobials</i> | pentamidine                                  |
| <i>Antimicrobials</i> | telithromycin                                |
| <i>Antimicrobials</i> | aciclostad                                   |
| <i>Antimicrobials</i> | amoxi_1a_pharma                              |
| <i>Antimicrobials</i> | amoxicillin,clavulanate                      |
| <i>Antimicrobials</i> | ceftriaxon_actavis                           |
| <i>Antimicrobials</i> | doxycyclin_00055701                          |
| <i>Antimicrobials</i> | fluconazole_in_sodium_chloride_injection_usp |
| <i>Antimicrobials</i> | fluoroquinolones                             |
| <i>Antimicrobials</i> | magistrale                                   |
| <i>Antimicrobials</i> | moxifloxacin                                 |
| <i>Antimicrobials</i> | nitrofurantoin                               |
| <i>Antipsychotics</i> | olanzapine                                   |
| <i>Antipsychotics</i> | aripiprazole                                 |
| <i>Antipsychotics</i> | quetiapine                                   |
| <i>Antipsychotics</i> | metoclopramide                               |
| <i>Antipsychotics</i> | clozapine                                    |
| <i>Antipsychotics</i> | risperidone                                  |
| <i>Antipsychotics</i> | chlorpromazine                               |
| <i>Antipsychotics</i> | cyamemazine                                  |
| <i>Antipsychotics</i> | haloperidol                                  |
| <i>Antipsychotics</i> | propiomazine                                 |
| <i>Antipsychotics</i> | prochlorperazine                             |
| <i>Antipsychotics</i> | ziprasidone                                  |
| <i>Antipsychotics</i> | domperidone                                  |
| <i>Antipsychotics</i> | fluphenazine                                 |
| <i>Antipsychotics</i> | paliperidone                                 |
| <i>Antipsychotics</i> | quetiapin                                    |
| <i>Antipsychotics</i> | zuclopenthixol                               |
| <i>Antipsychotics</i> | ability_aripiprazole                         |
| <i>Antipsychotics</i> | amisulpride                                  |
| <i>Antipsychotics</i> | antipsychotics                               |
| <i>Antipsychotics</i> | chlorprothixene                              |
| <i>Antipsychotics</i> | dominal                                      |

|                        |                                    |
|------------------------|------------------------------------|
| <i>Antipsychotics</i>  | levomepromazine                    |
| <i>Antipsychotics</i>  | methotrimeprazine                  |
| <i>Antipsychotics</i>  | neuleptil_periciazine              |
| <i>Antipsychotics</i>  | pipamperone                        |
| <i>Antipsychotics</i>  | thioridazine                       |
| <i>Benzodiazepines</i> | diazepam                           |
| <i>Benzodiazepines</i> | alprazolam                         |
| <i>Benzodiazepines</i> | clonazepam                         |
| <i>Benzodiazepines</i> | oxazepam                           |
| <i>Benzodiazepines</i> | temazepam                          |
| <i>Benzodiazepines</i> | lorazepam                          |
| <i>Benzodiazepines</i> | nordazepam                         |
| <i>Benzodiazepines</i> | midazolam                          |
| <i>Benzodiazepines</i> | bromazepam                         |
| <i>Benzodiazepines</i> | nordiazepam                        |
| <i>Benzodiazepines</i> | nitrazepam                         |
| <i>Benzodiazepines</i> | benzodiazepine_derivatives         |
| <i>Benzodiazepines</i> | 7_aminoflunitrazepam_flunitrazepam |
| <i>Benzodiazepines</i> | benzodiazepine                     |
| <i>Benzodiazepines</i> | flunitrazepam                      |
| <i>Benzodiazepines</i> | 1_hydroxymidazolam                 |
| <i>Benzodiazepines</i> | benzodiazepines                    |
| <i>Benzodiazepines</i> | 7_aminoflunitrazepam               |
| <i>Benzodiazepines</i> | clotiazepam                        |
| <i>Benzodiazepines</i> | noctamide                          |
| <i>Benzodiazepines</i> | nordiazepam_no_pref_name           |
| <i>Benzodiazepines</i> | prazepam                           |
| <i>Benzodiazepines</i> | tavor                              |
| <i>Benzodiazepines</i> | veratran                           |
| <i>Benzodiazepines</i> | benzodiazepine_related_drugs       |
| <i>Benzodiazepines</i> | benzos_benzodiazepines             |
| <i>Benzodiazepines</i> | chlordiazepoxide                   |
| <i>Benzodiazepines</i> | etizolam                           |
| <i>Benzodiazepines</i> | flurazepam                         |
| <i>Benzodiazepines</i> | normabel                           |
| <i>Benzodiazepines</i> | rohipnol                           |
| <i>Benzodiazepines</i> | temaz                              |
| <i>Benzodiazepines</i> | valium_00017001                    |
| <i>Cannabinoids</i>    | cannabis                           |



|                                 |                                                    |
|---------------------------------|----------------------------------------------------|
| <i>Cannabinoids</i>             | marijuana                                          |
| <i>Cannabinoids</i>             | dronabinol                                         |
| <i>Cannabinoids</i>             | tetrahydrocannabinol                               |
| <i>Cannabinoids</i>             | 8_tetrahydrocannabinol                             |
| <i>Cannabinoids</i>             | cannabis_sativa                                    |
| <i>Cannabinoids</i>             | thc                                                |
| <i>Cannabinoids</i>             | cannabis_et_resine                                 |
| <i>Cannabinoids</i>             | thc_cannabis_sativa                                |
| <i>Cannabinoids</i>             | thc_no_pref_name                                   |
| <i>Cannabinoids</i>             | cannabis_resin                                     |
| <i>Cannabinoids</i>             | cannabis_sativa_oil                                |
| <i>Cannabinoids</i>             | marijuana_cannabis                                 |
| <i>Cannabinoids</i>             | marijuana_cannibas                                 |
| <i>Cannabinoids</i>             | ab_fubinaca                                        |
| <i>Cannabinoids</i>             | cannabinoids                                       |
| <i>Cannabinoids</i>             | cannabis_and_resin                                 |
| <i>Cannabinoids</i>             | cannabis_cannabis_sativa                           |
| <i>Cannabinoids</i>             | cannabis_formulation_unknown_cannabis              |
| <i>Cannabinoids</i>             | cannabis_sativa_cannabis_cannabis_sativa           |
| <i>Cannabinoids</i>             | cannabis_sativa_subsp_indica_top                   |
| <i>Cannabinoids</i>             | cannabis_sativa_subsp_sativa_flowering_top         |
| <i>Cannabinoids</i>             | cannabis_tea                                       |
| <i>Cannabinoids</i>             | delta_9_carboxy_tetrahydrocannabinol               |
| <i>Cannabinoids</i>             | marijuana_cannabis_sativa                          |
| <i>Cannabinoids</i>             | marijuana_no_pref_name                             |
| <i>Cannabinoids</i>             | marijuana_thc_hemp_hash                            |
| <i>Cannabinoids</i>             | thc_cannabis_staiva                                |
| <i>Cannabinoids</i>             | thc_cannabs_satva                                  |
| <i>Cannabinoids</i>             | unspecified_cannabinoids                           |
| <i>Cannabinoids</i>             | unspecified_formulatin_of_tetrahydrocannasinol_thc |
| <i>Cocaine</i>                  | cocaine                                            |
| <i>Cocaine</i>                  | benzoylecgonine                                    |
| <i>Cocaine</i>                  | crack_cocaine                                      |
| <i>Cocaine</i>                  | ecgonine                                           |
| <i>Dissociative_Anesthetics</i> | ketamine                                           |
| <i>Dissociative_Anesthetics</i> | norketamine                                        |
| <i>Dissociative_Anesthetics</i> | phencyclidine                                      |
| <i>Dissociative_Anesthetics</i> | propofol                                           |
| <i>Dissociative_Anesthetics</i> | nitrous_oxide                                      |

|                                 |                                                                  |
|---------------------------------|------------------------------------------------------------------|
| <i>Dissociative_Anesthetics</i> | pcp                                                              |
| <i>Dissociative_Anesthetics</i> | 3_methoxyphencyclidine                                           |
| <i>Dissociative_Anesthetics</i> | methoxamine                                                      |
| <i>Dissociative_Anesthetics</i> | norketamie                                                       |
| <i>Ethanol</i>                  | ethanol                                                          |
| <i>Ethanol</i>                  | alcool                                                           |
| <i>Ethanol</i>                  | lager                                                            |
| <i>Ethanol</i>                  | alcool_modifie                                                   |
| <i>HIV</i>                      | ritonavir                                                        |
| <i>HIV</i>                      | darunavir                                                        |
| <i>HIV</i>                      | raltegravir                                                      |
| <i>HIV</i>                      | emtricitabine                                                    |
| <i>HIV</i>                      | emtricitabine,tenofovir                                          |
| <i>HIV</i>                      | atazanavir                                                       |
| <i>HIV</i>                      | emtricitabine,tenofovir_disoproxil                               |
| <i>HIV</i>                      | abacavir                                                         |
| <i>HIV</i>                      | lamivudine                                                       |
| <i>HIV</i>                      | tenofovir                                                        |
| <i>HIV</i>                      | zidovudine                                                       |
| <i>HIV</i>                      | acyclovir                                                        |
| <i>HIV</i>                      | bms561390                                                        |
| <i>HIV</i>                      | didanosine                                                       |
| <i>HIV</i>                      | ledipasvir                                                       |
| <i>HIV</i>                      | nevirapine                                                       |
| <i>HIV</i>                      | saquinavir                                                       |
| <i>HIV</i>                      | tmc_114                                                          |
| <i>HIV</i>                      | cobicistat,elvitegravir,emtricitabine,tenofovir                  |
| <i>HIV</i>                      | cobicistat,elvitegravir,emtricitabine,tenofovir_alafenamide      |
| <i>HIV</i>                      | cobicistat,elvitegravir,emtricitabine,tenofovir_disoproxil       |
| <i>HIV</i>                      | dolutegravir                                                     |
| <i>HIV</i>                      | emtricitabine,tenofovir_alafenamide                              |
| <i>HIV</i>                      | emtricitabine_tenofovir_disoproxil_tenofovir_disoproxil_fumarate |
| <i>HIV</i>                      | eviplera                                                         |
| <i>HIV</i>                      | rilpivirine                                                      |
| <i>Lithium</i>                  | lithium                                                          |
| <i>MDMA_metabs_analogs</i>      | mda                                                              |
| <i>MDMA_metabs_analogs</i>      | tenamfetamine                                                    |
| <i>MDMA_metabs_analogs</i>      | para_methoxymethamphetamine                                      |
| <i>MDMA_metabs_analogs</i>      | methylene_dioxyamphetamine                                       |

|                            |                                                                |
|----------------------------|----------------------------------------------------------------|
| <i>MDMA_metabs_analogs</i> | paramethoxyamphetamine_no_pref_name                            |
| <i>MDMA_metabs_analogs</i> | 5_6_methylenedioxy_2_aminoindane_mdai                          |
| <i>MDMA_metabs_analogs</i> | mdai                                                           |
| <i>MDMA_metabs_analogs</i> | methoxyamphetamine                                             |
| <i>MDMA_metabs_analogs</i> | methylone                                                      |
| <i>MDMA_metabs_analogs</i> | n_ethylpentylone                                               |
| <i>MDMA_metabs_analogs</i> | p_methoxyamphetamine_no_pref_name                              |
| <i>MDMA_metabs_analogs</i> | paramethoxymethamphetamine                                     |
| <i>MDMA_metabs_analogs</i> | pma                                                            |
| <i>MDMA_metabs_analogs</i> | pmma                                                           |
| <i>MDMA_metabs_analogs</i> | mda_ecstasy                                                    |
| <i>Muscle_Relaxant</i>     | methocarbamol                                                  |
| <i>Muscle_Relaxant</i>     | cyclobenzaprine                                                |
| <i>Muscle_Relaxant</i>     | carisoprodol                                                   |
| <i>Muscle_Relaxant</i>     | baclofen                                                       |
| <i>Muscle_Relaxant</i>     | muscle_relaxants                                               |
| <i>Muscle_Relaxant</i>     | naprotag_flex_naproxen_carisoprodol                            |
| <i>Muscle_Relaxant</i>     | orphenadrine                                                   |
| <i>Muscle_Relaxant</i>     | tizanidine                                                     |
| <i>Nicotine</i>            | nicotine                                                       |
| <i>Nicotine</i>            | tobacco                                                        |
| <i>Nicotine</i>            | nicotiana                                                      |
| <i>Nicotine</i>            | tabac_poudre_de                                                |
| <i>Nicotine</i>            | tabacum                                                        |
| <i>Nicotine</i>            | varenicline                                                    |
| <i>NonOpioid_Pain</i>      | acetaminophen                                                  |
| <i>NonOpioid_Pain</i>      | ibuprofen                                                      |
| <i>NonOpioid_Pain</i>      | aspirin                                                        |
| <i>NonOpioid_Pain</i>      | diclofenac                                                     |
| <i>NonOpioid_Pain</i>      | anadin_ibuprofen                                               |
| <i>NonOpioid_Pain</i>      | naproxen                                                       |
| <i>NonOpioid_Pain</i>      | paracetamol                                                    |
| <i>NonOpioid_Pain</i>      | anadin_ibuprofen_no_pref_name                                  |
| <i>NonOpioid_Pain</i>      | ibuprofen_oral_suspension_ups_100_mg_5_ml_rx_alpha_ibuprofen_o |
| <i>NonOpioid_Pain</i>      | nuprofen                                                       |
| <i>Opioids</i>             | methadone                                                      |
| <i>Opioids</i>             | morphine                                                       |
| <i>Opioids</i>             | codeine                                                        |
| <i>Opioids</i>             | oxycodone                                                      |

|                |                                                  |
|----------------|--------------------------------------------------|
| <i>Opioids</i> | heroin                                           |
| <i>Opioids</i> | buprenorphine                                    |
| <i>Opioids</i> | fentanyl                                         |
| <i>Opioids</i> | acetaminophen,oxycodone                          |
| <i>Opioids</i> | tramadol                                         |
| <i>Opioids</i> | hydromorphone                                    |
| <i>Opioids</i> | tilidine                                         |
| <i>Opioids</i> | hydrocodone                                      |
| <i>Opioids</i> | dihydrocodeine                                   |
| <i>Opioids</i> | hydrocodone,acetaminophen                        |
| <i>Opioids</i> | acetaminophen,codeine                            |
| <i>Opioids</i> | acetaminophen,hydrocodone                        |
| <i>Opioids</i> | substitol                                        |
| <i>Opioids</i> | pethidine                                        |
| <i>Opioids</i> | co_proxamol                                      |
| <i>Opioids</i> | diamorphine                                      |
| <i>Opioids</i> | monoacetyl_morphine                              |
| <i>Opioids</i> | non_pmn_buprenorphine                            |
| <i>Opioids</i> | opiods                                           |
| <i>Opioids</i> | 6_mam_diamorphine                                |
| <i>Opioids</i> | 6_mam_no_pref_name                               |
| <i>Opioids</i> | burprenorphine                                   |
| <i>Opioids</i> | codoliprane                                      |
| <i>Opioids</i> | ketobemidone                                     |
| <i>Opioids</i> | opioid_analgesic                                 |
| <i>Opioids</i> | opioid_analgesic_nos                             |
| <i>Opioids</i> | prontalgine                                      |
| <i>Opioids</i> | u_47700                                          |
| <i>Opioids</i> | 6_mam                                            |
| <i>Opioids</i> | acetaminophen,caffeine,dihydrocodeine            |
| <i>Opioids</i> | acetaminophen_butalbital_caffeine_codeine        |
| <i>Opioids</i> | acetaminophen_caffeine_citrate_codeine_phosphate |
| <i>Opioids</i> | acetaminophen_caffeine_codeine_phosphate         |
| <i>Opioids</i> | acetaminophen_hydrocodone_no_pref_name           |
| <i>Opioids</i> | acetaminophen_with_propoxyphene_hcl              |
| <i>Opioids</i> | black_tar_heroin                                 |
| <i>Opioids</i> | buprenorphin                                     |
| <i>Opioids</i> | butalbital_asa_caffeine_codeine                  |
| <i>Opioids</i> | chlorhydrate_de_tramadol                         |

|                           |                                                       |
|---------------------------|-------------------------------------------------------|
| <i>Opioids</i>            | dextropropoxyphene                                    |
| <i>Opioids</i>            | dhc                                                   |
| <i>Opioids</i>            | diamorphine_hcl                                       |
| <i>Opioids</i>            | endone                                                |
| <i>Opioids</i>            | heroin_diamorphine                                    |
| <i>Opioids</i>            | heroin_diamorphine_diamorphine                        |
| <i>Opioids</i>            | lamaline                                              |
| <i>Opioids</i>            | lamaline_acetaminophen_belladonna_leaf_caffeine_opium |
| <i>Opioids</i>            | lortab_loratadine                                     |
| <i>Opioids</i>            | methadon_amidone_hcl                                  |
| <i>Opioids</i>            | methadon_hcl                                          |
| <i>Opioids</i>            | morphine_sulfate_unk                                  |
| <i>Opioids</i>            | opium_morphine                                        |
| <i>Opioids</i>            | oramorph_sr_sustained_release                         |
| <i>Opioids</i>            | oxycontin_talbets_oxycodone_hcl                       |
| <i>Opioids</i>            | oxymorphone                                           |
| <i>Opioids</i>            | panlor                                                |
| <i>Opioids</i>            | paregoric_liquid_usp_alpharma_paregoric               |
| <i>Opioids</i>            | remifentanil                                          |
| <i>Opioids</i>            | skenan                                                |
| <i>Psychedelics</i>       | lsd                                                   |
| <i>Psychedelics</i>       | lysergide                                             |
| <i>Psychedelics</i>       | lysergic_acid_diethylamide                            |
| <i>Psychedelics</i>       | psilocybine                                           |
| <i>Psychedelics</i>       | dimethyltryptamine                                    |
| <i>Psychedelics</i>       | dmt_01757201                                          |
| <i>Psychedelics</i>       | dmt_dimethyltryptamine                                |
| <i>Psychedelics</i>       | ergot_alkaloids                                       |
| <i>Psychedelics</i>       | hallucinogenc_mushroom                                |
| <i>Psychedelics</i>       | hallucinogenic_mushroom                               |
| <i>Psychedelics</i>       | lsd_tartrate_de                                       |
| <i>Psychedelics</i>       | lysergic_acid_diethylamide_lsd                        |
| <i>Psychedelics</i>       | mushroom                                              |
| <i>Psychedelics</i>       | mushroom_tea_psilocybine                              |
| <i>Psychedelics</i>       | mushrooms                                             |
| <i>Psychedelics</i>       | other_psychostimulants_and_nootropics                 |
| <i>Psychedelics</i>       | lsd_25                                                |
| <i>Sedative Hypnotics</i> | zolpidem                                              |
| <i>Sedative Hypnotics</i> | ghb                                                   |

|                           |                                   |
|---------------------------|-----------------------------------|
| <i>Sedative Hypnotics</i> | gamma_hydroxybutyrate             |
| <i>Sedative Hypnotics</i> | melatonin                         |
| <i>Sedative Hypnotics</i> | zopiclone                         |
| <i>Sedative Hypnotics</i> | gamma_butyrolactone               |
| <i>Sedative Hypnotics</i> | oxybate_sodium                    |
| <i>Sedative Hypnotics</i> | clonidine                         |
| <i>Sedative Hypnotics</i> | phenobarbital                     |
| <i>Sedative Hypnotics</i> | zaleplon                          |
| <i>Sedative Hypnotics</i> | barbiturates_and_derivatives      |
| <i>Sedative Hypnotics</i> | sleeping_pills                    |
| <i>Sedative Hypnotics</i> | ximovan                           |
| <i>Sedative Hypnotics</i> | gamma_hydroxybutyric_acid_ecstasy |
| <i>Sedative Hypnotics</i> | sodium_oxybate                    |

**Table S3. Multivariate Adjusted Odds Ratios for Odds of Death**

| <b>Class Name</b>                    | <b>aOR</b> | <b>95%CI-Lo</b> | <b>95%CI-Hi</b> |
|--------------------------------------|------------|-----------------|-----------------|
| <b>Opioids</b>                       | 1.31       | 1.11            | 1.55            |
| <b>Antidepressants</b>               | 1.67       | 1.31            | 2.16            |
| <b>Benzodiazepines</b>               | 1.75       | 1.42            | 2.19            |
| <b>Amphetamines &amp; Stimulants</b> | 2.21       | 1.69            | 2.94            |
| <b>Cannabinoids</b>                  | 0.37       | 0.25            | 0.54            |
| <b>Antipsychotics</b>                | 0.42       | 0.28            | 0.61            |
| <b>Cocaine</b>                       | 0.41       | 0.28            | 0.60            |
| <b>Dissociative Anesthetics</b>      | 1.37       | 0.93            | 2.06            |
| <b>Psychedelics</b>                  | 0.25       | 0.12            | 0.48            |
| <b>Anesthetics</b>                   | 2.95       | 1.56            | 6.49            |
| <b>HIV</b>                           | 0.40       | 0.15            | 0.75            |
| <b>AEDs</b>                          | 0.49       | 0.29            | 0.80            |
| <b>Sedative Hypnotics</b>            | 0.61       | 0.34            | 1.06            |
| <b>Ethanol</b>                       | 1.98       | 1.03            | 3.94            |
| <b>Antimicrobials</b>                | 0.07       | 0.01            | 0.27            |
| <b>MDMA Metab. &amp; Analogs</b>     | 7.11       | 1.99            | 45.81           |
| <b>Muscle Relaxants</b>              | 10.61      | 3.51            | 35.97           |
| <b>*Lithium</b>                      | NA         | NA              | NA              |
| <b>Nicotine</b>                      | 0.08       | 0.01            | 0.31            |

**Supp. Table S3 Legend.** Multivariate adjusted odds ratios for risk of death per additional drug added on from each class. 95% Confidence intervals reported. Adjusted Odds Ratios (aOR) greater than 1 indicate increased risk of death. Adjusted Odds Ratios less than 1 indicate decreased risk of death. (\*Note that the aOR for Lithium is incalculable due to no occurrences of death in the study).

**Table S4. Multivariate Adjusted Odds Ratios for Odds of Death, Binary Predictors**

| <b>Class Name</b>                    | <b>aOR</b> | <b>95%CI-Lo</b> | <b>95%CI-Hi</b> |
|--------------------------------------|------------|-----------------|-----------------|
| <b>Opioids</b>                       | 2.05       | 1.46            | 2.90            |
| <b>Antidepressants</b>               | 1.62       | 1.11            | 2.36            |
| <b>Benzodiazepines</b>               | 2.25       | 1.61            | 3.15            |
| <b>Amphetamines &amp; Stimulants</b> | 3.05       | 2.13            | 4.41            |
| <b>Cannabinoids</b>                  | 0.33       | 0.22            | 0.48            |
| <b>Antipsychotics</b>                | 0.40       | 0.25            | 0.62            |
| <b>Cocaine</b>                       | 0.42       | 0.28            | 0.62            |
| <b>Dissociative Anesthetics</b>      | 1.42       | 0.83            | 2.45            |
| <b>Psychedelics</b>                  | 0.26       | 0.13            | 0.50            |
| <b>Anesthetics</b>                   | 7.13       | 2.37            | 26.93           |
| <b>HIV</b>                           | 0.10       | 0.01            | 0.38            |
| <b>AEDs</b>                          | 0.83       | 0.44            | 1.54            |
| <b>Sedative Hypnotics</b>            | 0.78       | 0.43            | 1.40            |
| <b>Ethanol</b>                       | 2.03       | 1.06            | 3.99            |
| <b>Antimicrobials</b>                | 0.06       | 0.01            | 0.27            |
| <b>MDMA Metab. &amp; Analogs</b>     | 8.71       | 2.46            | 55.49           |
| <b>Muscle Relaxants</b>              | 8.17       | 2.87            | 25.98           |
| <b>*Lithium</b>                      | NA         | NA              | NA              |
| <b>Nicotine</b>                      | 0.09       | 0.01            | 0.35            |

**Supp. Table S4 Legend.** Multivariate adjusted odds ratios for risk of death associated with each drug class (coded as a binary predictor). 95% Confidence intervals reported. Adjusted Odds Ratios (aOR) greater than 1 indicate increased risk of death. Adjusted Odds Ratios less than 1 indicate decreased risk of death. (\*Note that the aOR for Lithium is incalculable due to no occurrences of death in the study).



**Table S5. Univariate Odds Ratios for Odds of Death, Antidepressants**

| Class Name          | OR   | 95%CI-Lo | 95%CI-Hi |
|---------------------|------|----------|----------|
| bupropion (n= 40)   | 2.82 | 1.43     | 5.96     |
| paroxetine (n= 53)  | 0.17 | 0.07     | 0.34     |
| fluoxetine (n= 62)  | 0.20 | 0.10     | 0.38     |
| venlafaxine (n= 66) | 1.97 | 1.19     | 3.36     |
| citalopram (n= 56)  | 1.92 | 1.10     | 3.42     |
| lofepramine (n= 30) | 0.11 | 0.03     | 0.31     |
| sertraline (n=26)   | 2.36 | 1.05     | 5.80     |
| mirtazapine (n= 19) | 0.36 | 0.12     | 0.95     |

**Supp. Table S5 Legend.** Univariate unadjusted odds ratios for risk of death with each individual antidepressant. 95% Confidence intervals reported. Odds Ratios greater than 1 indicate increased risk of death. Odds Ratios less than 1 indicate decreased risk of death.

**Table S6. Univariate Odds Ratios for Odds of Death, Antipsychotics**

| Class Name             | OR   | 95%CI-Lo | 95%CI-Hi |
|------------------------|------|----------|----------|
| olanzapine (n= 71)     | 1.86 | 1.13     | 3.10     |
| aripiprazole (n= 33)   | 0.07 | 0.01     | 0.22     |
| quetiapine (n= 54)     | 0.64 | 0.41     | 0.97     |
| *metoclopramide (n=18) | NA   | NA       | NA       |
| clozapine (n= 11)      | 0.10 | 0.01     | 0.53     |
| *risperidone (n= 11)   | NA   | NA       | NA       |

**Supp. Table S6 Legend.** Univariate unadjusted odds ratios for risk of death with each individual antipsychotic. 95% Confidence intervals reported. Odds Ratios greater than 1 indicate increased risk of death. Odds Ratios less than 1 indicate decreased risk of death. (\*Note that the odds ratio for metoclopramide is incalculable due to no occurrences of survival in the study, conversely the odds ratio for risperidone is incalculable due to no occurrences of death during the study).
